# Supplementary material for: Which preferences associate with school performance?—Lessons from an exploratory study with university students
Source: PLoS One. 2018 Feb 16;13(2):e0190163. doi: 10.1371/journal.pone.0190163 (PMC5815576; doi:10.1371/journal.pone.0190163)
Supplement: S1 File — (DO) [file pone.0190163.s003.do]

*Public analysis
global IN "D:\Dropbox\Shared\AGREEE\Kísérletek\Kooperáció és kompetitivitás\stata\"
global OUT "D:\Dropbox\Shared\AGREEE\Kísérletek\Kooperáció és kompetitivitás\stata\"
global TEX "d:\Dropbox\Shared\AGREEE\Kísérletek\Kooperáció és kompetitivitás\tanulmány\journal versions\"
set scheme s2mono, permanently

use "${OUT}Supporting Information_Dataset.dta", clear
********************************************************
*Descriptives
********************************************************
*Correlations
estpost corr time_now time_later present_bias risk_aver unc_aver coop compet overconfidence crt knowledge female , matrix
esttab . using "${TEX}corr1.tex", not unstack compress  replace booktabs page label
esttab . using "${OUT}corr1.csv", not unstack compress  replace  label

*descriptives
sum  time_now time_later df1 df2 risk_aver unc_aver present_bias coop compet overconfidence knowledge crt female exam GPA 
sum  time_now time_later df1 df2 risk_aver unc_aver present_bias coop compet overconfidence knowledge crt female exam GPA if (exam~=. | GPA~=.)


sum exam if GPA~=.
twoway (lfitci exam GPA,  lp(dash) lc(gs6)) (scatter exam GPA) (lowess exam GPA, bw(1)  lc(cranberry)) ,  note(N=`r(N)') ytitle("exam") xtitle("GPA") legend(lab(1) lab(2 "linear fit with ci") lab (3) lab (4 "lowess")) 
graph export "${TEX}\Fig 1.emf", replace 

estpost corr time_now time_later present_bias risk_aver unc_aver coop exam GPA , matrix
esttab . using "${TEX}corr2.tex", not unstack compress replace booktabs page label keep(exam GPA) longtable noobs nonotes
esttab . using "${OUT}corr2.csv", not unstack compress replace label keep(exam GPA) longtable noobs nonotes

estpost corr compet overconfidence crt knowledge female exam GPA , matrix
esttab . using "${TEX}corr2.tex", not unstack compress append booktabs page label keep(exam GPA) longtable noobs nonotes
esttab . using "${OUT}corr2.csv", not unstack compress append label keep(exam GPA) longtable noobs nonotes


*Lowesses
	*all in
		*exam results
foreach v of var  coop risk_aver unc_aver time_now time_later present_bias overconfidenceD overconfidence compet crt knowledge  {
d `v'
sum `v' if exam~=., d
local min=r(min)
local med=r(p50)
local max=r(max)

twoway (lfitci exam `v',  lp(dash) lc(gs6)) (scatter exam `v') (lowess exam `v' , bw(1)  lc(cranberry)) ,  xlabel(`min' `med' `max') note(N=`r(N)') ytitle("exam") title("") legend(off) 
graph save "${OUT}\`v'_exam.emf", replace 
graph export "${TEX}\`v'_exam.eps", replace as(eps)
}


		*GPA 2015 autumn
		
foreach v of var  coop risk_aver unc_aver time_now time_later present_bias overconfidenceD overconfidence compet crt knowledge  {
d `v'
sum `v' if GPA~=., d
local min=r(min)
local med=r(p50)
local max=r(max)
twoway (lfitci GPA `v',  lp(dash) lc(gs6)) (scatter GPA `v') (lowess GPA `v' , bw(1)  lc(cranberry) ) , xlabel(`min' `med' `max') note(N=`r(N)') ytitle("GPA") title("") legend(off) 
graph save "${OUT}\`v'_gpa.emf", replace 
graph export "${TEX}\`v'_gpa.eps", replace as(eps)
}

graph combine "${OUT}risk_aver_exam.emf" "${OUT}unc_aver_exam.emf" "${OUT}risk_aver_gpa.emf" "${OUT}unc_aver_gpa.emf" 
	graph save "${OUT}\Fig 2.emf", replace 

graph combine "${OUT}time_now_exam.emf" "${OUT}time_later_exam.emf" "${OUT}time_now_gpa.emf" "${OUT}time_later_gpa.emf"
	graph save "${OUT}\Fig 3.emf", replace 

graph combine  "${OUT}present_bias_exam.emf"  "${OUT}present_bias_gpa.emf"  
	graph save "${OUT}\Fig 4.emf", replace 

graph combine "${OUT}coop_exam.emf" "${OUT}compet_exam.emf" "${OUT}coop_gpa.emf" "${OUT}compet_gpa.emf" 
	graph save "${OUT}\Fig 5.emf", replace 

graph combine "${OUT}crt_exam.emf" "${OUT}knowledge_exam.emf" "${OUT}crt_gpa.emf" "${OUT}knowledge_gpa.emf"  
	graph save "${OUT}\Fig 6.emf", replace 


		
***************************************************************************
*Regressions

	
* FE regressions
	*exam
areg exam time_nowx female , a(edate) cluster(edate)
	outreg2 using "${TEX}exam", replace addnote("clustered se on exam time") label ctitle("exam") addtext(exam time FE, y, weights, n)
	outreg2 using "${OUT}exam.xls", replace addnote("clustered se on exam time") label ctitle("exam") addtext(exam time FE, y, weights, n)
foreach v of var  time_laterx risk_averx unc_averx present_bias_x coopx compet   crt  {
areg exam `v' female , a(edate) cluster(edate)
	outreg2 using "${TEX}exam", append label ctitle("exam") addtext(exam time FE, y, weights, n)
	outreg2 using "${OUT}exam.xls", append label ctitle("exam") addtext(exam time FE, y, weights, n)
}
areg exam knowledge female , a(edate) cluster(edate)
	outreg2 using "${TEX}exam", append label ctitle("exam") addtext(exam time FE, y, weights, n) tex(frag) 
	outreg2 using "${OUT}exam.xls", append label ctitle("exam") addtext(exam time FE, y, weights, n) 

	
	*GPA
areg GPA time_nowx female , a(major) cluster(major)
	outreg2 using "${TEX}GPA", replace addnote("clustered se in parentheses") label ctitle("GPA ") addtext(major FE, y, freq. weights, n)
	outreg2 using "${OUT}GPA.xls", replace addnote("clustered se in parentheses") label ctitle("GPA ") addtext(major FE, y, freq. weights, n)
areg GPA time_nowx female [fw=credits_all], a(major) cluster(ID)
	outreg2 using "${TEX}GPAw", replace addnote("clustered se in parentheses") label ctitle("GPA") addtext(major FE, y, freq. weights, y)
	outreg2 using "${OUT}GPAw.xls", replace addnote("clustered se in parentheses") label ctitle("GPA") addtext(major FE, y, freq. weights, y)

foreach v of var  time_laterx risk_averx unc_averx present_bias_x coopx compet   crt    {
areg GPA `v' female , a(major) cluster(major)
	outreg2 using "${TEX}GPA", append addnote("clustered se in parentheses") label ctitle("GPA ") addtext(major FE, y, freq. weights, n)
	outreg2 using "${OUT}GPA.xls", append addnote("clustered se in parentheses") label ctitle("GPA ") addtext(major FE, y, freq. weights, n)
areg GPA `v' female [fw=credits_all], a(major) cluster(ID)
	outreg2 using "${TEX}GPAw", append addnote("clustered se in parentheses") label ctitle("GPA") addtext(major FE, y, freq. weights, y)
	outreg2 using "${OUT}GPAw.xls", append addnote("clustered se in parentheses") label ctitle("GPA") addtext(major FE, y, freq. weights, y)
}
areg GPA knowledge female , a(major) cluster(major)
	outreg2 using "${TEX}GPA", append addnote("clustered se in parentheses") label ctitle("GPA ") addtext(major FE, y, freq. weights, n)
	outreg2 using "${OUT}GPA.xls", append addnote("clustered se in parentheses") label ctitle("GPA ") addtext(major FE, y, freq. weights, n)
areg GPA knowledge  female [fw=credits_all], a(major) cluster(ID)
	outreg2 using "${TEX}GPAw", append addnote("clustered se in parentheses") label ctitle("GPA") addtext(major FE, y, freq. weights, y) tex(frag)
	outreg2 using "${OUT}GPAw.xls", append addnote("clustered se in parentheses") label ctitle("GPA") addtext(major FE, y, freq. weights, y) tex(frag)


	
*present bias, new function
			
	areg exam present_bias0 present_bias1 female , a(edate) cluster(edate)
		outreg2 using "${OUT}x4.xls", replace addnote("clustered se in parentheses") label ctitle("exam") addtext(exam time FE, y, weights, n)
		outreg2 using "${TEX}pres_bias", replace addnote("clustered se in parentheses") label ctitle("Exam") addtext(exam time FE, y, weights, n)
	areg GPA present_bias0 present_bias1  female , a(major) cluster(major)
		outreg2 using "${OUT}x4.xls", append addnote("se in parentheses") label ctitle("GPA") addtext(faculty FE, y, weights, n)
		outreg2 using "${TEX}pres_bias", append addnote("se in parentheses") label ctitle("GPA") addtext(faculty FE, y, weights, n)
	areg GPA present_bias0 present_bias1 female [fw=credits] , cluster(ID) a(major) 
		outreg2 using "${OUT}x4.xls", append addnote("clustered se in parentheses") label ctitle("GPA") addtext(faculty FE, y, weights, y)
		outreg2 using "${TEX}pres_bias", append addnote("clustered se in parentheses") label ctitle("GPA") addtext(faculty FE, y, weights, y) tex(frag)

*time preferences, new function

	areg exam time_nowx female , a(edate) cluster(edate)
		outreg2 using "${OUT}x4b.xls", replace addnote("clustered se in parentheses") label ctitle("exam") addtext(exam time FE, y, weights, n)
		outreg2 using "${TEX}timepref", replace addnote("clustered se in parentheses") label ctitle("Exam") addtext(exam time FE, y, weights, n)
	areg exam time_nowx time_now_sq female , a(edate) cluster(edate)
		outreg2 using "${OUT}x4b.xls", append addnote("clustered se in parentheses") label ctitle("exam") addtext(exam time FE, y, weights, n)
		outreg2 using "${TEX}timepref", append addnote("clustered se in parentheses") label ctitle("Exam") addtext(exam time FE, y, weights, n)
	areg GPA time_nowx female , a(major) cluster(major)
		outreg2 using "${OUT}x4b.xls", append addnote("se in parentheses") label ctitle("GPA") addtext(major FE, y, weights, n)
		outreg2 using "${TEX}timepref", append addnote("se in parentheses") label ctitle("GPA") addtext(major FE, y, weights, n)
	areg GPA time_nowx time_now_sq female , a(major) cluster(major)
		outreg2 using "${OUT}x4b.xls", append addnote("se in parentheses") label ctitle("GPA") addtext(major FE, y, weights, n)
		outreg2 using "${TEX}timepref", append addnote("se in parentheses") label ctitle("GPA") addtext(major FE, y, weights, n)
	areg GPA time_nowx  female [fw=credits] , cluster(ID) a(major) 
		outreg2 using "${OUT}x4b.xls", append addnote("clustered se in parentheses") label ctitle("GPA") addtext(major FE, y, weights, y)
		outreg2 using "${TEX}timepref", append addnote("clustered se in parentheses") label ctitle("GPA") addtext(major FE, y, weights, y) tex(frag)
	areg GPA time_nowx time_now_sq female [fw=credits] , cluster(ID) a(major) 
		outreg2 using "${OUT}x4b.xls", append addnote("clustered se in parentheses") label ctitle("GPA") addtext(major FE, y, weights, y)
		outreg2 using "${TEX}timepref", append addnote("clustered se in parentheses") label ctitle("GPA") addtext(major FE, y, weights, y) tex(frag)
				
	areg exam time_laterx female , a(edate) cluster(edate)
		outreg2 using "${OUT}x4c.xls", replace addnote("clustered se in parentheses") label ctitle("exam") addtext(exam time FE, y, weights, n)
		outreg2 using "${TEX}timepref2", replace addnote("clustered se in parentheses") label ctitle("Exam") addtext(exam time FE, y, weights, n)
	areg exam time_laterx time_later_sq female , a(edate) cluster(edate)
		outreg2 using "${OUT}x4c.xls", append addnote("clustered se in parentheses") label ctitle("exam") addtext(exam time FE, y, weights, n)
		outreg2 using "${TEX}timepref2", append addnote("clustered se in parentheses") label ctitle("Exam") addtext(exam time FE, y, weights, n)
	areg GPA time_laterx female , a(major) cluster(major)
		outreg2 using "${OUT}x4c.xls", append addnote("se in parentheses") label ctitle("GPA") addtext(major FE, y, weights, n)
		outreg2 using "${TEX}timepref2", append addnote("se in parentheses") label ctitle("GPA") addtext(major FE, y, weights, n)
	areg GPA time_laterx time_later_sq female , a(major) cluster(major)
		outreg2 using "${OUT}x4c.xls", append addnote("se in parentheses") label ctitle("GPA") addtext(major FE, y, weights, n)
		outreg2 using "${TEX}timepref2", append addnote("se in parentheses") label ctitle("GPA") addtext(major FE, y, weights, n)
	areg GPA time_laterx  female [fw=credits] , cluster(ID) a(major) 
		outreg2 using "${OUT}x4c.xls", append addnote("clustered se in parentheses") label ctitle("GPA") addtext(major FE, y, weights, y)
		outreg2 using "${TEX}timepref2", append addnote("clustered se in parentheses") label ctitle("GPA") addtext(major FE, y, weights, y) tex(frag)
	areg GPA time_laterx time_later_sq female [fw=credits] , cluster(ID) a(major) 
		outreg2 using "${OUT}x4c.xls", append addnote("clustered se in parentheses") label ctitle("GPA") addtext(major FE, y, weights, y)
		outreg2 using "${TEX}timepref2", append addnote("clustered se in parentheses") label ctitle("GPA") addtext(major FE, y, weights, y) tex(frag)

	*cooperativeness, new function

	areg exam coopx female , a(edate) cluster(edate)
		outreg2 using "${OUT}x4d.xls", replace addnote("clustered se in parentheses") label ctitle("exam") addtext(exam time FE, y, weights, n)
		outreg2 using "${TEX}coopx", replace addnote("clustered se in parentheses") label ctitle("Exam") addtext(exam time FE, y, weights, n)
	areg exam coopx coop_sq female , a(edate) cluster(edate)
		outreg2 using "${OUT}x4d.xls", append addnote("clustered se in parentheses") label ctitle("exam") addtext(exam time FE, y, weights, n)
		outreg2 using "${TEX}coopx", append addnote("clustered se in parentheses") label ctitle("Exam") addtext(exam time FE, y, weights, n)
	areg GPA coopx female , a(major) cluster(major)
		outreg2 using "${OUT}x4d.xls", append addnote("se in parentheses") label ctitle("GPA") addtext(major FE, y, weights, n)
		outreg2 using "${TEX}coopx", append addnote("se in parentheses") label ctitle("GPA") addtext(major FE, y, weights, n)
	areg GPA coopx coop_sq female , a(major) cluster(major)
		outreg2 using "${OUT}x4d.xls", append addnote("se in parentheses") label ctitle("GPA") addtext(major FE, y, weights, n)
		outreg2 using "${TEX}coopx", append addnote("se in parentheses") label ctitle("GPA") addtext(major FE, y, weights, n)
	areg GPA coopx female [fw=credits] , cluster(ID) a(major) 
		outreg2 using "${OUT}x4d.xls", append addnote("clustered se in parentheses") label ctitle("GPA") addtext(major FE, y, weights, y)
		outreg2 using "${TEX}coopx", append addnote("clustered se in parentheses") label ctitle("GPA") addtext(major FE, y, weights, y) tex(frag)
	areg GPA coopx coop_sq female [fw=credits] , cluster(ID) a(major) 
		outreg2 using "${OUT}x4d.xls", append addnote("clustered se in parentheses") label ctitle("GPA") addtext(major FE, y, weights, y)
		outreg2 using "${TEX}coopx", append addnote("clustered se in parentheses") label ctitle("GPA") addtext(major FE, y, weights, y) tex(frag)	
		
		

*risk aversion vs. time preferences	
	areg exam present_bias0 present_bias1 risk_averx female , a(edate) cluster(edate)
		outreg2 using "${OUT}x4a.xls", replace addnote("clustered se in parentheses") label ctitle("exam") addtext(exam time FE, y, weights, n)
		outreg2 using "${TEX}pres_bias_a", replace addnote("clustered se in parentheses") label ctitle("Exam") addtext(exam time FE, y, weights, n)
	areg GPA present_bias0 present_bias1 risk_averx female , a(major) cluster(major)
		outreg2 using "${OUT}x4a.xls", append addnote("se in parentheses") label ctitle("GPA") addtext(major FE, y, weights, n)
		outreg2 using "${TEX}pres_bias_a", append addnote("se in parentheses") label ctitle("GPA") addtext(major FE, y, weights, n)
	areg GPA present_bias0 present_bias1 risk_averx female [fw=credits] , cluster(ID) a(major) 
		outreg2 using "${OUT}x4a.xls", append addnote("clustered se in parentheses") label ctitle("GPA") addtext(major FE, y, weights, y)
		outreg2 using "${TEX}pres_bias_a", append addnote("clustered se in parentheses") label ctitle("GPA") addtext(major FE, y, weights, y)
	areg exam time_laterx time_later_sq risk_averx  female , a(edate) cluster(edate)
		outreg2 using "${OUT}x4a.xls", append addnote("clustered se in parentheses") label ctitle("exam") addtext(major FE, y, weights, n)
		outreg2 using "${TEX}pres_bias_a", replace addnote("clustered se in parentheses") label ctitle("Exam") addtext(major FE, y, weights, n)
	areg GPA time_laterx time_later_sq risk_averx   female , a(major) cluster(major)
		outreg2 using "${OUT}x4a.xls", append addnote("se in parentheses") label ctitle("GPA") addtext(major FE, y, weights, n)
		outreg2 using "${TEX}pres_bias_a", append addnote("se in parentheses") label ctitle("GPA") addtext(major FE, y, weights, n)
	areg GPA time_laterx time_later_sq risk_averx  female [fw=credits] , cluster(ID) a(major) 
		outreg2 using "${OUT}x4a.xls", append addnote("clustered se in parentheses") label ctitle("GPA") addtext(major FE, y, weights, y)
		outreg2 using "${TEX}pres_bias_a", append addnote("clustered se in parentheses") label ctitle("GPA") addtext(major FE, y, weights, y) tex(frag)


*Competition and cognitive skills

	areg exam compet knowledge crt female , a(edate) cluster(edate)
		outreg2 using "${OUT}comp.xls", replace addnote("clustered se in parentheses") label ctitle("exam") addtext(exam time FE, y, weights, n)
		outreg2 using "${TEX}comp", replace addnote("clustered se in parentheses") label ctitle("Exam") addtext(exam time FE, y, weights, n)
	areg GPA compet knowledge crt female , a(major) cluster(major)
		outreg2 using "${OUT}comp.xls", append addnote("se in parentheses") label ctitle("GPA") addtext(major FE, y, weights, n)
		outreg2 using "${TEX}comp", append addnote("se in parentheses") label ctitle("GPA") addtext(major FE, y, weights, n)
	areg GPA compet knowledge crt female [fw=credits] , cluster(ID) a(major) 
		outreg2 using "${OUT}comp.xls", append addnote("clustered se in parentheses") label ctitle("GPA") addtext(major FE, y, weights, y)
		outreg2 using "${TEX}comp", append addnote("clustered se in parentheses") label ctitle("GPA") addtext(major FE, y, weights, y)
		
*With many variables
	areg exam present_bias0 present_bias1 risk_averx coopx coop_sq compet crt knowledge female , a(edate) cluster(edate)
		outreg2 using "${OUT}x5.xls", replace addnote("clustered se in parentheses") label ctitle("exam") addtext(exam time FE, y, weights, n)
		outreg2 using "${TEX}many", replace addnote("clustered se in parentheses") label ctitle("Exam") addtext(exam time FE, y, weights, n)
	areg GPA present_bias0 present_bias1 risk_averx coopx coop_sq compet crt knowledge female , a(major) cluster(major)
		outreg2 using "${OUT}x5.xls", append addnote("se in parentheses") label ctitle("GPA") addtext(major FE, y, weights, n)
		outreg2 using "${TEX}many", append addnote("se in parentheses") label ctitle("GPA") addtext(major FE, y, weights, n)
	areg GPA present_bias0 present_bias1 risk_averx coopx coop_sq compet crt knowledge female [fw=credits] , cluster(ID) a(major) 
		outreg2 using "${OUT}x5.xls", append addnote("clustered se in parentheses") label ctitle("GPA") addtext(major FE, y, weights, y)
		outreg2 using "${TEX}many", append addnote("clustered se in parentheses") label ctitle("GPA") addtext(major FE, y, weights, y) 
	areg exam time_laterx time_later_sq risk_averx coopx coop_sq compet crt knowledge female, a(edate) cluster(edate)
		outreg2 using "${OUT}x5.xls", append  addnote("clustered se in parentheses") label ctitle("exam") addtext(exam time FE, y, weights, n)
		outreg2 using "${TEX}many", append addnote("clustered se in parentheses") label ctitle("Exam") addtext(exam time FE, y, weights, n)
	areg GPA time_laterx time_later_sq risk_averx coopx coop_sq compet crt knowledge female, a(major) cluster(major)
		outreg2 using "${OUT}x5.xls", append addnote("se in parentheses") label ctitle("GPA") addtext(major FE, y, weights, n)
		outreg2 using "${TEX}many", append addnote("se in parentheses") label ctitle("GPA") addtext(major FE, y, weights, n)
	areg GPA time_laterx time_later_sq risk_averx coopx coop_sq compet crt knowledge female [fw=credits] , cluster(ID) a(major) 
		outreg2 using "${OUT}x5.xls", append addnote("clustered se in parentheses") label ctitle("GPA") addtext(major FE, y, weights, y)
		outreg2 using "${TEX}many", append addnote("clustered se in parentheses") label ctitle("GPA") addtext(major FE, y, weights, y) tex(frag)
